# Supplementary material for: Patients with Metachronous Peritoneal Metastatic Mucinous Colorectal Adenocarcinoma Benefit More from Cytoreductive Surgery (CRS) and Hyperthermic Intraperitoneal Chemotherapy (HIPEC) than Their Synchronous Counterparts
Source: MDPI journal article supplement (doi:10.3390/cancers14163978), 2022-08-17
Supplement: s1 [file s1]

**Table S1.** Complete pre-, peri- and postoperative demographic and clinical characteristics of study participants having synchronous peritoneal metastases (PM). Unit of frequency and survival data is the number of observations (percentage) and median survival time (95% confidence interval), respectively.

| Clinical Characteristics                           | Synchronous PM (n = 129) | sAC (n = 93)           | sMAC (n = 36)          | Crude p-value | Adjusted p-value |
|----------------------------------------------------|--------------------------|------------------------|------------------------|---------------|------------------|
| Age (year)                                         | 54.23 ± 12.14            | 54.74 ± 11.09          | 52.90 ± 14.60          |               | 1.0000           |
| Body mass index (kg/m <sup>2</sup> )               | 25.27 ± 4.86             | 25.52 ± 5.07           | 24.66 ± 4.32           |               | 1.0000           |
| Sex (male:female)                                  | 63:66<br>(48.8%:51.2%)   | 44:49<br>(47.3%:52.7%) | 19:17<br>(52.8%:47.2%) |               | 1.0000           |
| ASA score                                          |                          |                        |                        |               |                  |
| - I-II                                             | 33 (25.6%)               | 21 (22.6%)             | 12 (33.3%)             |               | 1.0000           |
| - III-IV                                           | 96 (74.4%)               | 72 (77.4%)             | 24 (66.7%)             |               |                  |
| Tumor location                                     |                          |                        |                        |               |                  |
| - Cecum                                            | 34 (26.4%)               | 23 (24.7%)             | 11 (30.6%)             |               |                  |
| - Ascending colon                                  | 28 (21.7%)               | 17 (18.3%)             | 11 (30.6%)             |               |                  |
| - Hepatic flexure                                  | 7 (5.4%)                 | 6 (6.5%)               | 1 (2.8%)               |               |                  |
| - Transverse colon                                 | 5 (3.9%)                 | 3 (3.2%)               | 2 (5.6%)               |               |                  |
| - Splenic flexure                                  | 2 (1.6%)                 | 1 (1.1%)               | 1 (2.8%)               |               | 1.0000           |
| - Descending colon                                 | 8 (6.2%)                 | 7 (7.5%)               | 1 (2.8%)               |               |                  |
| - Sigmoid colon                                    | 30 (23.3%)               | 23 (24.7%)             | 7 (19.4%)              |               |                  |
| - Rectosigmoid                                     | 4 (3.1%)                 | 3 (3.2%)               | 1 (2.8%)               |               |                  |
| - Rectum                                           | 9 (7.0%)                 | 8 (8.6%)               | 1 (2.8%)               |               |                  |
| - Multiplex                                        | 2 (1.6%)                 | 2 (2.2%)               | 0 (0%)                 |               |                  |
| Sidedness                                          |                          |                        |                        |               |                  |
| - Left-sided                                       | 44 (34.1%)               | 34 (36.6%)             | 10 (27.8%)             |               |                  |
| - Right-sided                                      | 74 (57.4%)               | 49 (52.7%)             | 25 (69.4%)             |               | 1.0000           |
| - Rectum                                           | 9 (7.0%)                 | 8 (8.6%)               | 1 (2.8%)               |               |                  |
| - Both (multiplex)                                 | 2 (1.6%)                 | 2 (2.2%)               | 0 (0%)                 |               |                  |
| Stage T (size of tumor) <sup>1</sup>               |                          |                        |                        |               |                  |
| - 1-2                                              | 3 (2.3%)                 | 3 (3.2%)               | 0 (0%)                 | 0.0518        | 1.0000           |
| - 3                                                | 31 (24.0%)               | 27 (29.0%)             | 4 (11.1%)              |               |                  |
| - 4                                                | 93 (72.1%)               | 62 (66.7%)             | 31 (86.1%)             |               |                  |
| Stage N (lymph node metastases) <sup>1</sup>       |                          |                        |                        |               |                  |
| - 0                                                | 23 (17.8%)               | 14 (15.1%)             | 9 (25.0%)              | 0.0343        | 1.0000           |
| - 1                                                | 33 (25.6%)               | 29 (31.2%)             | 4 (11.1%)              |               |                  |
| - 2-3                                              | 71 (55.0%)               | 48 (51.6%)             | 23 (63.9%)             |               |                  |
| RAS (wild:mutant) <sup>2</sup>                     | 24:26                    | 21:17                  | 3:9                    | -             | -                |
| BRAF (wild:mutant) <sup>2</sup>                    | 14:4                     | 12:3                   | 2:1                    | -             | -                |
| Microsatellite (stable:instable) <sup>2</sup>      | 32:2                     | 30:1                   | 2:1                    | -             | -                |
| Lineage of chemotherapy                            |                          |                        |                        |               |                  |
| - First line                                       | 90 (69.8%)               | 70 (75.3%)             | 20 (55.6%)             | 0.0201        | 1.0000           |
| - Second line                                      | 8 (6.2%)                 | 7 (7.5%)               | 1 (2.8%)               |               |                  |
| - Third line                                       | 3 (2.3%)                 | 1 (1.1%)               | 2 (5.6%)               |               |                  |
| Usage of biological agents                         |                          |                        |                        |               |                  |
| - Bevacizumab                                      | 32 (24.8%)               | 21 (22.6%)             | 11 (30.6%)             |               | 1.0000           |
| - Cetuximab / Panitumumab                          | 26 (20.2%)               | 22 (23.7%)             | 4 (11.1%)              |               |                  |
| Radiotherapy                                       | 8 (6.2%)                 | 6 (6.5%)               | 2 (5.6%)               |               | 1.0000           |
| Any previous surgeries related to CRC <sup>3</sup> |                          |                        |                        |               |                  |
| - Number of surgeries (single:multiple)            | 69:41<br>(53.5%:31.8%)   | 48:34<br>(51.6%:36.6%) | 21:7<br>(58.3%:19.4%)  |               | 1.0000           |
| - Primary tumor resected                           | 93 (72.1%)               | 70 (75.3%)             | 23 (63.9%)             |               | 1.0000           |

|                                                    |                |                |                |               |        |
|----------------------------------------------------|----------------|----------------|----------------|---------------|--------|
| Type of previous surgeries <sup>3</sup>            |                |                |                |               |        |
| - Primary tumor resection only                     | 45 (34.9%)     | 31 (33.3%)     | 14 (38.9%)     |               | 1.0000 |
| - Laparoscopic exploration only                    | 11 (8.5%)      | 7 (7.5%)       | 4 (11.1%)      |               | 1.0000 |
| - Metastasis removal (excl. Perit.)                | 43 (33.3%)     | 34 (36.6%)     | 9 (25.0%)      |               | 1.0000 |
| - Partial peritonectomy                            | 30 (23.3%)     | 27 (29.0%)     | 3 (8.3%)       | <b>0.0114</b> | 0.6959 |
| Peritoneal carcinomatosis index                    | 7.67 ± 6.63    | 6.69 ± 5.83    | 10.22 ± 7.89   | <b>0.0080</b> | 0.4983 |
| CC score                                           |                |                |                |               |        |
| - CC-0                                             | 112 (86.8%)    | 83 (89.2%)     | 29 (80.6%)     |               | 1.0000 |
| - CC-1                                             | 10 (7.8%)      | 7 (7.5%)       | 3 (8.3%)       |               |        |
| - CC-2                                             | 7 (5.4%)       | 3 (3.2%)       | 4 (11.1%)      |               |        |
| Time between CRS+HIPEC and tumor diagnosis (month) | 10.06 ± 10.24  | 10.10 ± 8.41   | 9.97 ± 14.04   |               | 1.0000 |
| HIPEC medication                                   |                |                |                |               |        |
| - Oxaliplatin                                      | 77 (59.7%)     | 56 (60.2%)     | 21 (58.3%)     |               | 1.0000 |
| - Mitomycin                                        | 52 (40.3%)     | 37 (39.8%)     | 15 (41.7%)     |               |        |
| Oxaliplatin (mg)                                   | 302.58 ± 15.93 | 301.77 ± 13.23 | 304.76 ± 21.82 |               | 1.0000 |
| Mitomycin (mg)                                     | 28.17 ± 8.11   | 27.16 ± 6.51   | 30.67 ± 11.00  |               | 1.0000 |
| Temperature of HIPEC                               |                |                |                |               |        |
| - 41°C                                             | 13 (10.1%)     | 11 (11.8%)     | 2 (5.6%)       |               | 1.0000 |
| - 42°C                                             | 116 (89.9%)    | 82 (88.2%)     | 34 (94.4%)     |               |        |
| Duration of HIPEC (min)                            |                |                |                |               |        |
| - 30                                               | 75 (58.1%)     | 55 (59.1%)     | 20 (55.6%)     |               | 1.0000 |
| - 60                                               | 15 (11.6%)     | 9 (9.7%)       | 6 (16.7%)      |               |        |
| - 90                                               | 39 (30.2%)     | 29 (31.2%)     | 10 (27.8%)     |               |        |
| Length of surgery excl. HIPEC (min)                | 269 ± 105.5    | 264 ± 104.5    | 282 ± 108.4    |               | 1.0000 |
| Surgical procedures                                |                |                |                |               |        |
| - Perit.: parietal                                 | 83 (64.3%)     | 58 (62.4%)     | 25 (69.4%)     |               | 1.0000 |
| - Perit.: pelvis                                   | 78 (60.5%)     | 57 (61.3%)     | 21 (58.3%)     |               | 1.0000 |
| - Perit.: omental bursa                            | 10 (7.8%)      | 4 (4.3%)       | 6 (16.7%)      | <b>0.0281</b> | 1.0000 |
| - Perit.: right upper quadrant                     | 38 (29.5%)     | 23 (24.7%)     | 15 (41.7%)     | <b>0.0840</b> | 1.0000 |
| - Perit.: left upper quadrant                      | 21 (16.3%)     | 9 (9.7%)       | 12 (33.3%)     | <b>0.0025</b> | 0.1585 |
| - Ana.: small bowel–small bowel                    | 27 (20.9%)     | 22 (23.7%)     | 5 (13.9%)      |               | 1.0000 |
| - Ana.: stomach–small bowel                        | 1 (0.8%)       | 0 (0%)         | 1 (2.8%)       |               | 1.0000 |
| - Ana.: small bowel–colon                          | 36 (27.9%)     | 24 (25.8%)     | 12 (33.3%)     |               | 1.0000 |
| - Ana.: colon–colon                                | 7 (5.4%)       | 7 (7.5%)       | 0 (0%)         |               | 1.0000 |
| - Ana.: colon–rectum                               | 54 (41.9%)     | 36 (38.7%)     | 18 (50.0%)     |               | 1.0000 |
| - Ana.: small bowel–rectum                         | 5 (3.9%)       | 2 (2.2%)       | 3 (8.3%)       |               | 1.0000 |
| - Colostomy                                        | 2 (1.6%)       | 1 (1.1%)       | 1 (2.8%)       |               | 1.0000 |
| - Ileostomy                                        | 26 (20.2%)     | 20 (21.5%)     | 6 (16.7%)      |               | 1.0000 |
| - Colon resection                                  | 60 (46.5%)     | 39 (41.9%)     | 21 (58.3%)     |               | 1.0000 |
| - Small bowel resection                            | 43 (33.3%)     | 28 (30.1%)     | 15 (41.7%)     |               | 1.0000 |
| - Rectosigmoid resection                           | 46 (35.7%)     | 31 (33.3%)     | 15 (41.7%)     |               | 1.0000 |
| - Splenectomy                                      | 9 (7.0%)       | 3 (3.2%)       | 6 (16.7%)      | <b>0.0142</b> | 0.8531 |
| - Cholecystectomy                                  | 61 (47.3%)     | 44 (47.3%)     | 17 (47.2%)     |               | 1.0000 |
| - Bladder resection                                | 2 (1.6%)       | 2 (2.2%)       | 0 (0%)         |               | 1.0000 |
| - Greater omentectomy                              | 87 (67.4%)     | 63 (67.7%)     | 24 (66.7%)     |               | 1.0000 |
| - Lesser omentectomy                               | 38 (29.5%)     | 26 (28.0%)     | 12 (33.3%)     |               | 1.0000 |
| - Hepatic metastasectomy                           | 24 (18.6%)     | 20 (21.5%)     | 4 (11.1%)      |               | 1.0000 |
| - No. of resected hepatic metastases               | 0.26 ± 0.74    | 0.32 ± 0.85    | 0.08 ± 0.28    |               | 1.0000 |

|                                    |                          |                          |                          |                                |
|------------------------------------|--------------------------|--------------------------|--------------------------|--------------------------------|
| Surgical procedures                |                          |                          |                          |                                |
| - Stomach resection                | 2 (1.6%)                 | 0 (0%)                   | 2 (5.6%)                 | 1.0000                         |
| - Hysterectomy                     | 28 (21.7%)               | 19 (20.4%)               | 9 (25.0%)                | 1.0000                         |
| - Adnexectomy                      | 34 (26.4%)               | 26 (28.0%)               | 8 (22.2%)                | 1.0000                         |
| - Resection of other organs        | 31 (24.0%)               | 23 (24.7%)               | 8 (22.2%)                | 1.0000                         |
| Length of hospital stay (day)      | 16.83 ± 12.24            | 16.68 ± 12.45            | 17.22 ± 11.85            | 1.0000                         |
| Length of ICU stay (day)           | 4.11 ± 2.98              | 4.17 ± 3.36              | 3.94 ± 1.69              | 1.0000                         |
| Complication grade (Clavien–Dindo) |                          |                          |                          |                                |
| - I                                | 71 (55.0%)               | 52 (55.9%)               | 19 (52.8%)               | 1.0000                         |
| - II                               | 33 (25.6%)               | 21 (22.6%)               | 12 (33.3%)               |                                |
| - III                              | 22 (17.1%)               | 18 (19.4%)               | 4 (11.1%)                |                                |
| - IV                               | 2 (1.6%)                 | 1 (1.1%)                 | 1 (2.8%)                 |                                |
| - V                                | 1 (0.8%)                 | 1 (1.1%)                 | 0 (0%)                   |                                |
| Complications                      |                          |                          |                          |                                |
| - Anastomotic insufficiency/leak   | 6 (4.7%)                 | 4 (4.3%)                 | 2 (5.6%)                 | 1.0000                         |
| - Pancreatitis                     | 1 (0.8%)                 | 0 (0%)                   | 1 (2.8%)                 | 1.0000                         |
| - Fistula                          | 1 (0.8%)                 | 0 (0%)                   | 1 (2.8%)                 | 1.0000                         |
| - Pulmonary embolism               | 2 (1.6%)                 | 2 (2.2%)                 | 0 (0%)                   | 1.0000                         |
| - Hematologic                      | 6 (4.7%)                 | 6 (6.5%)                 | 0 (0%)                   | 1.0000                         |
| - Mortality (30 days)              | 1 (0.8%)                 | 1 (1.1%)                 | 0 (0%)                   | 1.0000                         |
| - Reoperation                      | 17 (13.2%)               | 12 (12.9%)               | 5 (13.9%)                | 1.0000                         |
| Median overall survival (month)    | 29.17<br>(22.97 – 35.32) | 34.99<br>(28.84 – 45.67) | 19.88<br>(14.59 – 28.16) | –<br><b>0.0028<sup>4</sup></b> |
| Median DSS (month)                 | 29.67<br>(25.20 – 37.19) | 36.27<br>(29.17 – 47.08) | 22.41<br>(18.92 – 29.60) | –<br><b>0.0229<sup>4</sup></b> |

<sup>1</sup> TNM information was missing for 1-1 patient of both groups. <sup>2</sup> Results were available for a selected number of patients only. <sup>3</sup> Including primary tumor removal surgeries, diagnostic/explorative laparoscopies, metastasectomies. <sup>4</sup> *p*-Value acquired from Cox regression survival model. Ana: anastomosis; ASA: American Society of Anesthesiologists; CC: Sugarbaker's completeness of cytoreduction score; DSS: disease-specific survival; HIPEC: Hyperthermic Intraperitoneal Chemotherapy; ICU: intensive care unit; Perit: peritonectomy; sAC: synchronous PM + non-mucinous adenocarcinoma; sMAC: synchronous PM + mucinous adenocarcinoma.

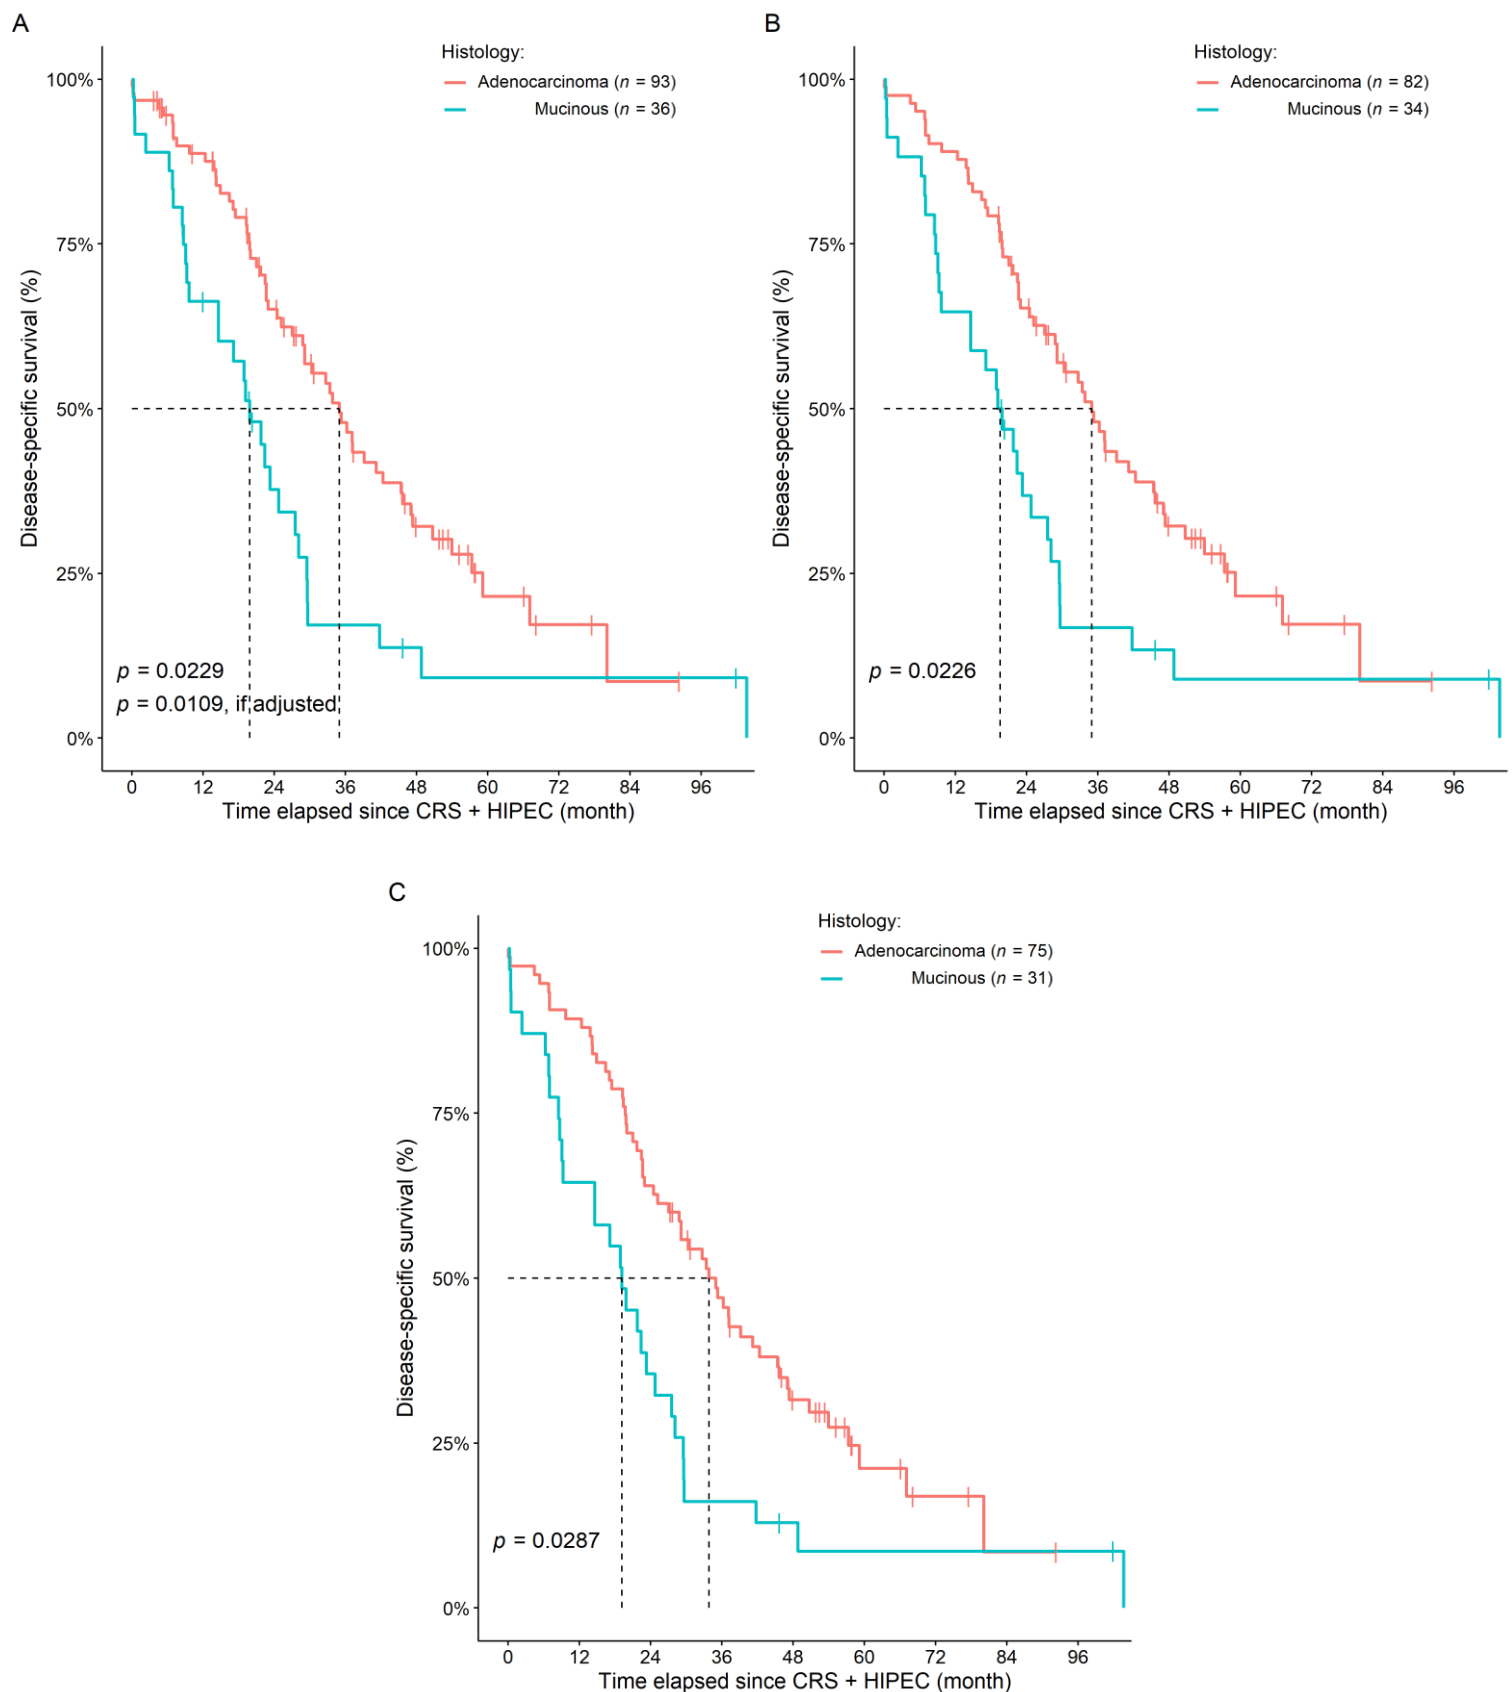

**Figure S1.** Differently adjusted survival curves of colorectal cancer patients with synchronous peritoneal metastasis. **A:** complete cohort; **B:** those patients were removed from the analysis, who had the CRS + HIPEC procedure in 2021; **C:** those patients were removed from the analysis, who had the CRS + HIPEC procedure in 202-2021. The histological diagnosis of mucinous adenocarcinoma was associated with inferior survival in all versions.

**Table S2.** Complete pre-, peri- and postoperative demographic and clinical characteristics of study participants having metachronous peritoneal metastases (PM). Unit of frequency and survival data is the number of observations (percentage) and median survival time (95% confidence interval), respectively.

| Clinical Characteristics                           | Metachronous PM (n = 89) | mAC (n = 67)           | mMAC (n = 22)          | Crude p-value | Adjusted p-value |
|----------------------------------------------------|--------------------------|------------------------|------------------------|---------------|------------------|
| Age (year)                                         | 55.90 ± 11.76            | 56.27 ± 11.66          | 54.76 ± 12.26          |               | 1.0000           |
| Body mass index (kg/m <sup>2</sup> )               | 25.70 ± 4.93             | 25.05 ± 4.03           | 27.64 ± 6.72           |               | 1.0000           |
| Sex (male:female)                                  | 45:44<br>(50.6%:49.4%)   | 35:32<br>(52.2%:47.8%) | 10:12<br>(45.5%:54.5%) |               | 1.0000           |
| ASA score                                          |                          |                        |                        |               |                  |
| - I–II                                             | 20 (22.5%)               | 16 (23.9%)             | 4 (18.2%)              |               | 1.0000           |
| - III–IV                                           | 69 (77.5%)               | 51 (76.1%)             | 18 (81.8%)             |               |                  |
| Tumor location                                     |                          |                        |                        |               |                  |
| - Cecum                                            | 13 (14.6%)               | 5 (7.5%)               | 8 (36.4%)              |               |                  |
| - Ascending colon                                  | 13 (14.6%)               | 12 (17.9%)             | 1 (4.5%)               |               |                  |
| - Hepatic flexure                                  | 5 (5.6%)                 | 2 (3.0%)               | 3 (13.6%)              |               |                  |
| - Transverse colon                                 | 3 (3.4%)                 | 3 (4.5%)               | 0 (0%)                 |               |                  |
| - Splenic flexure                                  | 3 (3.4%)                 | 3 (4.5%)               | 0 (0%)                 | 0.0064        | 0.3991           |
| - Descending colon                                 | 7 (7.9%)                 | 7 (10.4%)              | 0 (0%)                 |               |                  |
| - Sigmoid colon                                    | 28 (31.5%)               | 21 (31.3%)             | 7 (31.8%)              |               |                  |
| - Rectosigmoid                                     | 2 (2.2%)                 | 2 (3.0%)               | 0 (0%)                 |               |                  |
| - Rectum                                           | 14 (15.7%)               | 12 (17.9%)             | 2 (9.1%)               |               |                  |
| - Unknown primary location                         | 1 (1.1%)                 | 0 (0%)                 | 1 (4.5%)               |               |                  |
| Sidedness                                          |                          |                        |                        |               |                  |
| - Left-sided                                       | 45 (50.6%)               | 33 (49.3%)             | 7 (31.8%)              |               |                  |
| - Right-sided                                      | 29 (32.6%)               | 22 (32.8%)             | 12 (54.5%)             | 0.0734        | 1.0000           |
| - Rectum                                           | 14 (15.7%)               | 12 (17.9%)             | 2 (9.1%)               |               |                  |
| - Unknown primary location                         | 1 (1.1%)                 | 0 (0%)                 | 1 (4.5%)               |               |                  |
| Stage T (size of tumor) <sup>1</sup>               |                          |                        |                        |               |                  |
| - 1-2                                              | 2 (2.2%)                 | 1 (1.5%)               | 1 (4.5%)               |               | 1.0000           |
| - 3                                                | 51 (57.3%)               | 40 (59.7%)             | 11 (50.0%)             |               |                  |
| - 4                                                | 32 (36.0%)               | 26 (38.8%)             | 7 (31.8%)              |               |                  |
| Stage N (lymph node metastases) <sup>1</sup>       |                          |                        |                        |               |                  |
| - 0                                                | 23 (25.8%)               | 18 (26.9%)             | 5 (22.7%)              |               | 1.0000           |
| - 1                                                | 36 (40.4%)               | 28 (41.8%)             | 6 (27.3%)              |               |                  |
| - 2-3                                              | 28 (31.5%)               | 21 (31.3%)             | 8 (36.4%)              |               |                  |
| Lineage of chemotherapy                            |                          |                        |                        |               |                  |
| - Second line                                      | 54 (60.7%)               | 40 (59.7%)             | 14 (63.6%)             |               | 1.0000           |
| - Third line                                       | 25 (28.1%)               | 21 (31.3%)             | 4 (18.2%)              |               |                  |
| Usage of biological agents                         |                          |                        |                        |               |                  |
| - Bevacizumab                                      | 16 (18.0%)               | 13 (19.4%)             | 3 (13.6%)              |               | 1.0000           |
| - Cetuximab / Panitumumab                          | 10 (11.2%)               | 7 (10.4%)              | 3 (13.6%)              |               |                  |
| Radiotherapy                                       | 8 (9.0%)                 | 8 (11.9%)              | 0 (0%)                 |               | 1.0000           |
| Any previous surgeries related to CRC <sup>2</sup> |                          |                        |                        |               |                  |
| - Number of surgeries (single:multiple)            | 39:48<br>(43.8%:53.9%)   | 31:35<br>(46.3%:52.2%) | 8:13<br>(36.4%:59.1%)  |               | 1.0000           |
| - Primary tumor resected                           | 84 (94.4%)               | 65 (97.0%)             | 19 (86.4%)             |               | 1.0000           |
| Type of previous surgeries <sup>2</sup>            |                          |                        |                        |               |                  |
| - Primary tumor resection only                     | 49 (55.1%)               | 39 (58.2%)             | 10 (45.5%)             |               | 1.0000           |
| - Laparoscopic exploration only                    | 2 (2.2%)                 | 1 (1.5%)               | 1 (4.5%)               |               | 1.0000           |
| - Metastasis removal (excl. Perit.)                | 34 (38.2%)               | 24 (35.8%)             | 10 (45.5%)             |               | 1.0000           |
| - Partial peritonectomy                            | 8 (9.0%)                 | 5 (7.5%)               | 3 (13.6%)              |               | 1.0000           |
| Peritoneal carcinomatosis index                    | 7.85 ± 5.70              | 7.43 ± 5.74            | 9.19 ± 5.49            |               | 1.0000           |

|                                                    |                                    |                |                |                |               |        |
|----------------------------------------------------|------------------------------------|----------------|----------------|----------------|---------------|--------|
| CC score                                           |                                    |                |                |                |               |        |
| -                                                  | CC-0                               | 78 (87.6%)     | 59 (88.1%)     | 19 (86.4%)     | 1.0000        |        |
| -                                                  | CC-1                               | 10 (11.2%)     | 8 (11.9%)      | 2 (9.1%)       |               |        |
| -                                                  | CC-2                               | 1 (1.1%)       | 0 (0%)         | 1 (4.5%)       |               |        |
| Time between CRS+HIPEC and tumor diagnosis (month) |                                    | 24.78 ± 20.07  | 23.52 ± 15.94  | 28.63 ± 29.47  | 1.0000        |        |
| HIPEC medication                                   |                                    |                |                |                |               |        |
| -                                                  | Oxaliplatin                        | 50 (56.2%)     | 39 (58.2%)     | 11 (50.0%)     | 1.0000        |        |
| -                                                  | Mitomycin                          | 39 (43.8%)     | 28 (41.8%)     | 11 (50.0%)     |               |        |
| Oxaliplatin (mg)                                   |                                    | 300.00 ± 20.20 | 297.44 ± 16.01 | 309.09 ± 30.15 | 1.0000        |        |
| Mitomycin (mg)                                     |                                    | 26.67 ± 6.82   | 25.89 ± 6.67   | 28.64 ± 7.10   | 1.0000        |        |
| Temperature of HIPEC                               |                                    |                |                |                |               |        |
| -                                                  | 41°C                               | 10 (11.2%)     | 8 (11.9%)      | 2 (9.1%)       | 1.0000        |        |
| -                                                  | 42°C                               | 79 (88.8%)     | 59 (88.1%)     | 20 (90.9%)     |               |        |
| Duration of HIPEC (min)                            |                                    |                |                |                |               |        |
| -                                                  | 30                                 | 50 (56.2%)     | 39 (58.2%)     | 11 (50.0%)     | 1.0000        |        |
| -                                                  | 60                                 | 17 (19.1%)     | 10 (14.9%)     | 7 (31.8%)      |               |        |
| -                                                  | 90                                 | 22 (24.7%)     | 18 (26.9%)     | 4 (18.2%)      |               |        |
| Length of surgery excl. HIPEC (min)                |                                    | 283.3 ± 101.3  | 276.7 ± 100.7  | 303.4 ± 102.8  | 1.0000        |        |
| Surgical procedures                                |                                    |                |                |                |               |        |
| -                                                  | Perit.: parietal                   | 60 (67.4%)     | 44 (65.7%)     | 16 (72.7%)     | 1.0000        |        |
| -                                                  | Perit.: pelvis                     | 58 (65.2%)     | 44 (65.7%)     | 14 (63.6%)     | 1.0000        |        |
| -                                                  | Perit.: omental bursa              | 4 (4.5%)       | 3 (4.5%)       | 1 (4.5%)       | 1.0000        |        |
| -                                                  | Perit.: right upper quadrant       | 25 (28.1%)     | 13 (19.4%)     | 12 (54.5%)     | <b>0.0026</b> | 0.1616 |
| -                                                  | Perit.: left upper quadrant        | 11 (12.4%)     | 5 (7.5%)       | 6 (27.3%)      | <b>0.0238</b> | 1.0000 |
| -                                                  | Ana.: small bowel–small bowel      | 26 (29.2%)     | 21 (31.3%)     | 5 (22.7%)      | 1.0000        |        |
| -                                                  | Ana.: stomach–small bowel          | 2 (2.2%)       | 2 (3.0%)       | 0 (0%)         | 1.0000        |        |
| -                                                  | Ana.: small bowel–colon            | 28 (31.5%)     | 18 (26.9%)     | 10 (45.5%)     | 1.0000        |        |
| -                                                  | Ana.: colon–colon                  | 1 (1.1%)       | 1 (1.5%)       | 0 (0%)         | 1.0000        |        |
| -                                                  | Ana.: colon–rectum                 | 35 (39.3%)     | 29 (43.3%)     | 6 (27.3%)      | 1.0000        |        |
| -                                                  | Ana.: small bowel–rectum           | 2 (2.2%)       | 1 (1.5%)       | 1 (4.5%)       | 1.0000        |        |
| -                                                  | Colostomy                          | 9 (10.1%)      | 8 (11.9%)      | 1 (4.5%)       | 1.0000        |        |
| -                                                  | Ileostomy                          | 15 (16.9%)     | 12 (17.9%)     | 3 (13.6%)      | 1.0000        |        |
| -                                                  | Colon resection                    | 47 (52.8%)     | 32 (47.8%)     | 15 (68.2%)     | 1.0000        |        |
| -                                                  | Small bowel resection              | 37 (41.6%)     | 27 (40.3%)     | 10 (45.5%)     | 1.0000        |        |
| -                                                  | Rectosigmoid resection             | 41 (46.1%)     | 33 (49.3%)     | 8 (36.4%)      | 1.0000        |        |
| -                                                  | Splenectomy                        | 10 (11.2%)     | 7 (10.4%)      | 3 (13.6%)      | 1.0000        |        |
| -                                                  | Cholecystectomy                    | 44 (49.4%)     | 35 (52.2%)     | 9 (40.9%)      | 1.0000        |        |
| -                                                  | Bladder resection                  | 4 (4.5%)       | 2 (3.0%)       | 2 (9.1%)       | 1.0000        |        |
| -                                                  | Greater omentectomy                | 67 (75.3%)     | 51 (76.1%)     | 16 (72.7%)     | 1.0000        |        |
| -                                                  | Lesser omentectomy                 | 18 (20.2%)     | 14 (20.9%)     | 4 (18.2%)      | 1.0000        |        |
| -                                                  | Hepatic metastasectomy             | 10 (11.2%)     | 9 (13.4%)      | 1 (4.5%)       | 1.0000        |        |
| -                                                  | No. of resected hepatic metastases | 0.15 ± 0.58    | 0.18 ± 0.65    | 0.05 ± 0.21    | 1.0000        |        |
| -                                                  | Pancreas resection                 | 4 (4.5%)       | 3 (4.5%)       | 1 (4.5%)       | 1.0000        |        |
| -                                                  | Stomach resection                  | 1 (1.1%)       | 1 (1.5%)       | 0 (0%)         |               |        |
| -                                                  | Hysterectomy                       | 22 (24.7%)     | 15 (22.4%)     | 7 (31.8%)      |               |        |
| -                                                  | Adnexectomy                        | 29 (32.6%)     | 21 (31.3%)     | 8 (36.4%)      |               |        |
| -                                                  | Resection of other organs          | 34 (38.2%)     | 26 (38.8%)     | 8 (36.4%)      |               |        |
| Length of hospital stay (day)                      |                                    | 17.06 ± 7.19   | 16.37 ± 6.72   | 19.24 ± 8.32   | 1.0000        |        |
| Length of ICU stay (day)                           |                                    | 3.84 ± 2.16    | 3.70 ± 2.01    | 4.27 ± 2.57    | 1.0000        |        |
| Complication grade (Clavien–Dindo)                 |                                    |                |                |                |               |        |
| -                                                  | I                                  | 38 (42.7%)     | 31 (46.3%)     | 7 (31.8%)      | 1.0000        |        |

|                                  |                          |                          |                                    |   |                     |
|----------------------------------|--------------------------|--------------------------|------------------------------------|---|---------------------|
| - II                             | 29 (32.6%)               | 21 (31.3%)               | 8 (36.4%)                          |   |                     |
| - III                            | 22 (24.7%)               | 15 (22.4%)               | 7 (31.8%)                          |   |                     |
| Complications                    |                          |                          |                                    |   |                     |
| - Anastomotic insufficiency/leak | 8 (9.0%)                 | 7 (10.4%)                | 1 (4.5%)                           |   | 1.0000              |
| - Pancreatitis                   | 1 (1.1%)                 | 1 (1.5%)                 | 0 (0%)                             |   | 1.0000              |
| - Fistula                        | 3 (3.4%)                 | 3 (4.5%)                 | 0 (0%)                             |   | 1.0000              |
| - Pulmonary embolism             | 1 (1.1%)                 | 1 (1.5%)                 | 0 (0%)                             |   | 1.0000              |
| - Hematologic                    | 5 (5.6%)                 | 3 (4.5%)                 | 2 (9.1%)                           |   | 1.0000              |
| - Mortality (30 days)            | 0 (0.0%)                 | 0 (0%)                   | 0 (0%)                             |   | 1.0000              |
| - Reoperation                    | 12 (13.5%)               | 9 (13.4%)                | 3 (13.6%)                          |   | 1.0000              |
| Median overall survival (month)  | 32.10<br>(26.97 – 45.40) | 32.10<br>(27.93 – 45.44) | 26.18<br>(19.12 – NA) <sup>3</sup> | – | 0.8210 <sup>4</sup> |
| Median DSS (month)               | 34.43<br>(28.48 – 48.13) | 34.43<br>(29.96 – 48.13) | 32.56<br>(19.12 – NA) <sup>3</sup> | – | 0.6490 <sup>4</sup> |

<sup>1</sup> TNM information was missing for 3 patients of the mucinous group due to the fact that no primary tumor resection was performed. <sup>2</sup> Including primary tumor removal surgeries, diagnostic/explorative laparoscopies, metastasectomies. <sup>3</sup> Not enough observation to reach lower 95% confidence interval. <sup>4</sup> *p*-Value acquired from Cox regression survival model. Ana: anastomosis; ASA: American Society of Anesthesiologists; CC: Sugarbaker's completeness of cytoreduction score; DSS: disease-specific survival; HIPEC: Hyperthermic Intraperitoneal Chemotherapy; ICU: intensive care unit; mAC: metachronous PM + non-mucinous adenocarcinoma; mMAC: metachronous PM + mucinous adenocarcinoma; Perit: peritonectomy.

**Table S3.** Comparison results of all four study groups (adjusted *p*-values of post-hoc test). The corresponding count and numerical data can be seen in Tables S1 and S2.

| Clinical parameter                                 | mAC vs. mMAC  | mAC vs. sAC        | mAC vs. sMAC       | mMAC vs. sAC       | mMAC vs. sMAC      | sAC vs. sMAC  |
|----------------------------------------------------|---------------|--------------------|--------------------|--------------------|--------------------|---------------|
| Age                                                | 0.9549        | 0.8529             | 0.5200             | 1.0000             | 0.9388             | 0.8601        |
| Body mass index                                    | 0.1317        | 0.9335             | 0.9788             | 0.2518             | 0.1046             | 0.8022        |
| 1.0000Sex                                          | 1.0000        | 1.0000             | 0.9585             | 1.0000             | 1.0000             | 1.0000        |
| ASA score                                          | 1.0000        | 1.0000             | 1.0000             | 0.8236             | 1.0000             | 0.9360        |
| Tumor location                                     | 0.8318        | 0.6371             | 0.1008             | 0.4228             | 0.2175             | 0.5136        |
| Sidedness                                          | 0.1940        | 0.2115             | <b>0.0159</b>      | 0.8095             | 0.6757             | 0.3403        |
| Stage T (size of tumor)                            | 0.7517        | <b>0.0006</b>      | <b>&lt; 0.0001</b> | 0.0995             | <b>0.0116</b>      | 0.2322        |
| Stage N (lymph node metastases)                    | 1.0000        | <b>0.0476</b>      | 0.0827             | 0.8844             | 0.9658             | 0.7302        |
| Lineage of chemotherapy                            | 1.0000        | 0.0557             | 0.7560             | 1.0000             | 1.0000             | 0.3621        |
| Usage of biological agents                         | 0.9767        | 0.1593             | 0.4790             | 0.5046             | 0.5825             | 1.0000        |
| Radiotherapy                                       | 0.3781        | 0.9503             | 0.9487             | 0.8935             | 0.8644             | 0.8614        |
| Any previous surgeries related to CRC              | 0.6927        | <b>0.0328</b>      | <b>0.0085</b>      | 0.4578             | 0.1509             | 0.5140        |
| - Primary tumor resected                           | 0.2684        | <b>0.0027</b>      | <b>0.0003</b>      | 0.4643             | 0.1359             | 0.4165        |
| - 1.0000                                           | 1.0000        | 0.9234             | 1.0000             | 0.8670             | 0.6877             | 1.0000        |
| - Partial peritonectomy                            | 1.0000        | <b>0.0024</b>      | 0.9118             | 0.3507             | 1.0000             | <b>0.0278</b> |
| Peritoneal carcinomatosis index                    | 0.6569        | 0.8710             | 0.1241             | 0.3277             | 0.9265             | <b>0.0189</b> |
| CC score                                           | 1.0000        | 0.8922             | 1.0000             | 1.0000             | 1.0000             | 0.9283        |
| Time between CRS+HIPEC and tumor diagnosis (month) | 0.5035        | <b>&lt; 0.0001</b> | <b>0.0001</b>      | <b>&lt; 0.0001</b> | <b>&lt; 0.0001</b> | 1.0000        |
| HIPEC medication                                   | 1.0000        | 1.0000             | 0.9903             | 1.0000             | 1.0000             | 1.0000        |
| Temperature of HIPEC                               | 1.0000        | 0.9818             | 1.0000             | 1.0000             | 1.0000             | 1.0000        |
| Duration of HIPEC (min)                            | 1.0000        | 1.0000             | 1.0000             | 1.0000             | 0.9947             | 1.0000        |
| Length of surgery excl. HIPEC (min)                | 0.7163        | 0.8655             | 0.9946             | 0.3713             | 0.8678             | 0.8079        |
| Surgical procedures                                |               |                    |                    |                    |                    |               |
| - Perit.: parietal                                 | 1.0000        | 1.0000             | 1.0000             | 1.0000             | 0.7989             | 1.0000        |
| - Perit.: pelvis                                   | 0.8645        | 1.0000             | 1.0000             | 1.0000             | 1.0000             | 1.0000        |
| - Perit.: omental bursa                            | 0.9910        | 1.0000             | 0.0818             | 1.0000             | 0.2732             | 0.0621        |
| - Perit.: right upper quadrant                     | <b>0.0099</b> | 0.4643             | 0.0709             | <b>0.0282</b>      | 0.5898             | 0.1727        |
| - Perit.: left upper quadrant                      | 0.0921        | 0.6968             | <b>0.0025</b>      | 0.1092             | 1.0000             | <b>0.0034</b> |



|                                      |        |               |        |        |        |        |
|--------------------------------------|--------|---------------|--------|--------|--------|--------|
| Surgical procedures                  |        |               |        |        |        |        |
| - Ana.: small bowel–small bowel      | 1.0000 | 1.0000        | 0.2968 | 0.9274 | 0.8950 | 1.0000 |
| - Ana.: stomach–small bowel          | 1.0000 | 0.6638        | 1.0000 | 1.0000 | 1.0000 | 1.0000 |
| - Ana.: small bowel–colon            | 0.4872 | 0.8894        | 0.9858 | 0.4165 | 1.0000 | 1.0000 |
| - Ana.: colon–colon                  | 1.0000 | 0.2284        | 1.0000 | 0.3682 | 1.0000 | 0.2512 |
| - Ana.: colon–rectum                 | 0.9298 | 0.5623        | 1.0000 | 0.9824 | 0.5294 | 0.9720 |
| - Ana.: small bowel–rectum           | 1.0000 | 0.8162        | 0.3660 | 1.0000 | 1.0000 | 0.3733 |
| - Colostomy                          | 0.6806 | <b>0.0120</b> | 0.2164 | 1.0000 | 0.7659 | 1.0000 |
| - Ileostomy                          | 1.0000 | 1.0000        | 0.8779 | 1.0000 | 1.0000 | 1.0000 |
| - Colon resection                    | 0.3888 | 0.4681        | 0.9217 | 0.1629 | 0.9353 | 0.4774 |
| - Small bowel resection              | 1.0000 | 0.9401        | 0.8910 | 1.0000 | 1.0000 | 0.8914 |
| - Rectosigmoid resection             | 1.0000 | 0.2577        | 1.0000 | 0.7945 | 1.0000 | 1.0000 |
| - Splenectomy                        | 1.0000 | 0.5545        | 0.8613 | 0.4815 | 0.6920 | 0.0926 |
| - Cholecystectomy                    | 1.0000 | 1.0000        | 1.0000 | 1.0000 | 1.0000 | 0.9927 |
| - Bladder resection                  | 0.5187 | 0.7508        | 1.0000 | 0.3711 | 0.2430 | 1.0000 |
| - Greater omentectomy                | 1.0000 | 1.0000        | 1.0000 | 1.0000 | 1.0000 | 0.9045 |
| - Lesser omentectomy                 | 0.8009 | 1.0000        | 1.0000 | 1.0000 | 1.0000 | 1.0000 |
| - Hepatic metastasectomy             | 0.9598 | 0.6639        | 0.7574 | 0.2950 | 1.0000 | 0.7268 |
| - No. of resected hepatic metastases | 0.8484 | 0.5406        | 0.8998 | 0.3040 | 0.9967 | 0.2680 |
| - Pancreas resection                 | 1.0000 | 0.2267        | 0.5361 | 0.6163 | 0.6354 | 1.0000 |
| - Stomach resection                  | 1.0000 | 1.0000        | 0.3689 | 1.0000 | 0.3936 | 0.0921 |
| - Hysterectomy                       | 1.0000 | 0.7718        | 1.0000 | 1.0000 | 1.0000 | 1.0000 |
| - Adnexectomy                        | 0.6529 | 1.0000        | 1.0000 | 1.0000 | 1.0000 | 1.0000 |
| - Resection of other organs          | 0.8284 | 0.3325        | 0.4003 | 0.8537 | 1.0000 | 1.0000 |
| Length of hospital stay (day)        | 0.6879 | 0.9978        | 0.9789 | 0.7395 | 0.8940 | 0.9935 |
| Length of ICU stay (day)             | 0.8173 | 0.6850        | 0.9708 | 0.9986 | 0.9681 | 0.9714 |
| Complication grade (Clavien–Dindo)   | 0.6142 | 0.5244        | 0.4534 | 0.1173 | 0.1901 | 0.9680 |

|                                  |        |        |               |        |               |               |
|----------------------------------|--------|--------|---------------|--------|---------------|---------------|
| Complications                    |        |        |               |        |               |               |
| - Anastomotic insufficiency/leak | 1.0000 | 0.7110 | 1.0000        | 0.9665 | 1.0000        | 1.0000        |
| - Pancreatitis                   | 1.0000 | 1.0000 | 1.0000        | 1.0000 | 1.0000        | 0.8319        |
| - Fistula                        | 0.8777 | 0.2267 | 1.0000        | 1.0000 | 1.0000        | 1.0000        |
| - Pulmonary embolism             | 1.0000 | 1.0000 | 1.0000        | 1.0000 | 1.0000        | 1.0000        |
| - Hematologic                    | 1.0000 | 1.0000 | 1.0000        | 0.6119 | 0.7543        | 0.6705        |
| - Mortality (30 days)            | 1.0000 | 1.0000 | 1.0000        | 1.0000 | 1.0000        | 1.0000        |
| - Reoperation                    | 0.     | 0.     | 0.            | 0.     | 0.            | 0.            |
| Median overall survival (month)  | 0.5966 | 0.6899 | <b>0.0118</b> | 0.7861 | <b>0.0179</b> | <b>0.0031</b> |
| Median DSS (month)               | 0.7728 | 0.9686 | <b>0.0302</b> | 0.7879 | 0.0782        | <b>0.0239</b> |

mAC: metachronous peritoneal metastasis + non-mucinous adenocarcinoma; mMAC: metachronous peritoneal metastasis + mucinous adenocarcinoma;  
sAC: synchronous peri-toneal metastasis + non-mucinous adenocarcinoma; sMAC: synchronous peritoneal metastasis + mucinous adenocarcinoma.
